# Supplementary material
Source: HighWire-hosted journal article supplement (http://www.jneurosci.org/highwire/filestream/599915/field_highwire_adjunct_files/3/Figure_S4.pdf)
Supplement: Figure_S4.pdf [file Figure_S4.pdf]

% of Dcp foci containing the indicated protein

| GW182 : | p54/Rck: | Ago2: | ZBP | FMRP | SMN: |
|---------|----------|-------|-----|------|------|
| 65%     | 90%      | 80%   | 90% | 90%  | 30%  |

% of foci of the indicated protein that contains Dcp1a

| GW182 : | p54/Rck: | Ago2: | ZBP | FMRP | SMN: |
|---------|----------|-------|-----|------|------|
| 70%     | 100%     | 35%   | 50% | 80%  | 25%  |
